# Supplementary material for: Aggressive Local Ablative Radiotherapy Mitigates Progression Risk in Oligometastatic Lung Adenocarcinoma
Source: PubMed Central journal article supplement — Cancer Res Treat. 2023 Aug 29;56(1):115–24. doi: 10.4143/crt.2023.600 (PMC10789958; doi:10.4143/crt.2023.600), 2023-08-29
Supplement: crt-2023-600_S3_Table.pdf [file crt-2023-600_S3_Table.pdf]

**S3 Table.** Univariate and multivariate analysis for progression-free survival and overall survival in the entire cohort (n=176)

| Variable                                                             | PFS                 |         |                       |         | OS                  |         |                       |         |
|----------------------------------------------------------------------|---------------------|---------|-----------------------|---------|---------------------|---------|-----------------------|---------|
|                                                                      | Univariate analysis |         | Multivariate analysis |         | Univariate analysis |         | Multivariate analysis |         |
|                                                                      | HR<br>(95% CI)      | p-value | HR<br>(95% CI)        | p-value | HR<br>(95% CI)      | p-value | HR<br>(95% CI)        | p-value |
| Sex (female vs. male)                                                | 0.82<br>(0.58-1.17) | 0.271   | -                     | -       | 0.73<br>(0.51-1.05) | 0.093   | -                     | -       |
| Age ( $\geq 60$ yr vs. $< 60$ yr)                                    | 0.70<br>(0.49-1.00) | 0.051   | -                     | -       | 1.01<br>(1.00-1.03) | 0.146   | -                     | -       |
| EGFR (positive vs. negative)                                         | 0.87<br>(0.62-1.23) | 0.425   | -                     | -       | 0.62<br>(0.43-0.90) | 0.011   | 0.63<br>(0.43-0.91)   | 0.014   |
| ALK (positive vs. negative)                                          | 0.44<br>(0.19-1.01) | 0.052   | -                     | -       | 0.54<br>(0.22-1.33) | 0.183   | -                     | -       |
| ROS1 (positive vs. negative)                                         | 0.68<br>(0.36-1.31) | 0.249   | -                     | -       | 0.74<br>(0.38-1.47) | 0.392   | -                     | -       |
| PD-L1 (positive vs. negative)                                        | 0.99<br>(0.69-1.41) | 0.949   | -                     | -       | 1.34<br>(0.92-1.95) | 0.122   | -                     | -       |
| No. of metastatic lesions (per 1 lesion)                             | 1.09<br>(0.85-1.41) | 0.497   | -                     | -       | 1.09<br>(0.83-1.42) | 0.531   | -                     | -       |
| Systemic therapy (TKI vs. no TKI)                                    | 1.32<br>(0.93-1.86) | 0.122   | -                     | -       | 1.51<br>(1.04-2.19) | 0.031   | 1.27<br>(0.77-2.10)   | 0.356   |
| RT site (bone vs. others)                                            | 1.22<br>(0.84-1.76) | 0.304   | -                     | -       | 1.01<br>(0.68-1.50) | 0.962   | -                     | -       |
| EQD2 ( $\geq 43.9$ Gy vs. $< 43.9$ Gy)                               | 0.83<br>(0.59-1.18) | 0.834   | -                     | -       | 0.97<br>(0.67-1.41) | 0.891   | -                     | -       |
| Oligometastatic disease state (Oligoprogression vs. oligometastasis) | 1.86<br>(1.27-2.73) | 0.002   | -                     | -       | 1.52<br>(1.01-2.30) | 0.045   | 1.49<br>(0.99-2.25)   | 0.056   |

ALK, anaplastic lymphoma receptor tyrosine kinase; CI, confidence interval; EGFR, epidermal growth factor receptor; EQD2, equivalent doses in 2 Gy fractions; HR, hazard ratio; OS, overall survival; PD-L1, programmed death-ligand 1; PFS, progression-free survival; ROS1, c-ros oncogene 1; RT, radiotherapy; TKI, tyrosine kinase inhibitor.
