# Supplementary material for: Aggressive Local Ablative Radiotherapy Mitigates Progression Risk in Oligometastatic Lung Adenocarcinoma
Source: PubMed Central journal article supplement — Cancer Res Treat. 2023 Aug 29;56(1):115–24. doi: 10.4143/crt.2023.600 (PMC10789958; doi:10.4143/crt.2023.600), 2023-08-29
Supplement: crt-2023-600_S4_Table.pdf [file crt-2023-600_S4_Table.pdf]

**S4 Table.** Univariate analysis for local failure-free survival in the oligometastasis group (n=54) and the oligoprogression group (n=122)

| Variable                                    | Oligometastasis group |         | Oligoprogression group |         |
|---------------------------------------------|-----------------------|---------|------------------------|---------|
|                                             | HR (95% CI)           | p-value | HR (95% CI)            | p-value |
| Sex (female vs. male)                       | 0.71 (0.17-2.97)      | 0.634   | 0.76 (0.35-1.63)       | 0.474   |
| Age ( $\geq$ 60 yr vs. < 60 yr)             | 0.47 (0.12-1.91)      | 0.294   | 1.00 (0.96-1.04)       | 0.983   |
| EGFR (positive vs. negative)                | 0.73 (0.18-2.96)      | 0.659   | 0.62 (0.29-1.36)       | 0.236   |
| ALK (positive vs. negative)                 | 0.85 (0.10-7.13)      | 0.884   | 2.17 (0.65-7.26)       | 0.207   |
| ROS1 (positive vs. negative)                | 0.04 (0.00-84.56)     | 0.402   | 0.62 (0.08-4.57)       | 0.637   |
| PD-L1 (positive vs. negative)               | 1.24 (0.29-5.31)      | 0.775   | 0.66 (0.28-1.51)       | 0.322   |
| Number of metastatic lesions (per 1 lesion) | 1.39 (0.52-3.75)      | 0.515   | 0.81 (0.42-1.55)       | 0.517   |
| Systemic therapy (TKI vs. no TKI)           | 2.78 (0.56-13.87)     | 0.214   | 1.55 (0.72-3.36)       | 0.268   |
| RT site (bone vs. others)                   | 1.51 (0.36-6.34)      | 0.573   | 0.68 (0.27-1.69)       | 0.408   |
| EQD2 ( $\geq$ 43.9 Gy vs. < 43.9 Gy)        | 2.94 (0.59-14.61)     | 0.189   | 1.91 (0.85-4.30)       | 0.119   |

ALK, anaplastic lymphoma receptor tyrosine kinase; CI, confidence interval; EGFR, epidermal growth factor receptor; EQD2, equivalent doses in 2 Gy fractions; HR, hazard ratio; PD-L1, programmed death-ligand 1; ROS1, c-ros oncogene 1; RT, radiotherapy; TKI, tyrosine kinase inhibitor.
