# Supplementary material for: Aggressive Local Ablative Radiotherapy Mitigates Progression Risk in Oligometastatic Lung Adenocarcinoma
Source: PubMed Central journal article supplement — Cancer Res Treat. 2023 Aug 29;56(1):115–24. doi: 10.4143/crt.2023.600 (PMC10789958; doi:10.4143/crt.2023.600), 2023-08-29
Supplement: crt-2023-600_S6_Table.pdf [file crt-2023-600_S6_Table.pdf]

**S6 Table.** Univariate analysis in the oligoprogression group (n=122)

| Variable                                    | sPFS             |         | OS               |         |
|---------------------------------------------|------------------|---------|------------------|---------|
|                                             | HR (95% CI)      | p-value | HR (95% CI)      | p-value |
| Sex (female vs. male)                       | 0.73 (0.49-1.11) | 0.139   | 0.73 (0.47-1.12) | 0.151   |
| Age ( $\geq$ 60 yr vs. < 60 yr)             | 0.76 (0.50-1.16) | 0.761   | 1.13 (0.72-1.79) | 0.596   |
| EGFR (positive vs. negative)                | 0.93 (0.61-1.40) | 0.711   | 0.73 (0.47-1.13) | 0.155   |
| ALK (positive vs. negative)                 | 0.79 (0.32-1.94) | 0.601   | 0.81 (0.30-2.23) | 0.688   |
| ROS1 (positive vs. negative)                | 1.48 (0.64-3.40) | 0.358   | 1.04 (0.42-2.58) | 0.929   |
| PD-L1 (positive vs. negative)               | 0.97 (0.64-1.48) | 0.898   | 1.66 (1.08-2.57) | 0.022   |
| Number of metastatic lesions (per 1 lesion) | 1.03 (0.76-1.40) | 0.854   | 0.92 (0.66-1.29) | 0.625   |
| Systemic therapy (TKI vs. no TKI)           | 0.88 (0.58-1.32) | 0.534   | 0.70 (0.46-1.08) | 0.111   |
| RT site (bone vs. others)                   | 0.88 (0.59-1.33) | 0.555   | 0.83 (0.54-1.29) | 0.403   |
| EQD2 ( $\geq$ 43.9 Gy vs. < 43.9 Gy)        | 0.76 (0.50-1.14) | 0.186   | 0.93 (0.60-1.44) | 0.752   |

ALK, anaplastic lymphoma receptor tyrosine kinase; CI, confidence interval; EGFR, epidermal growth factor receptor; EQD2, equivalent doses in 2 Gy fractions; HR, hazard ratio; OS, overall survival; PD-L1, programmed death-ligand 1; ROS1, c-ros oncogene 1; RT, radiotherapy; sPFS, subsequent progression-free survival; TKI, tyrosine kinase inhibitor.
