# Supplementary material for: Aggressive Local Ablative Radiotherapy Mitigates Progression Risk in Oligometastatic Lung Adenocarcinoma
Source: PubMed Central journal article supplement — Cancer Res Treat. 2023 Aug 29;56(1):115–24. doi: 10.4143/crt.2023.600 (PMC10789958; doi:10.4143/crt.2023.600), 2023-08-29
Supplement: crt-2023-600_S7_Table.pdf [file crt-2023-600_S7_Table.pdf]

**S7 Table.** Systemic therapy in the oligoprogression group (n=122)

|                                            | No. (%)   |
|--------------------------------------------|-----------|
| Systemic regimen at the time of LART       |           |
| TKI                                        | 50 (41.0) |
| Immunotherapy                              | 43 (35.2) |
| Cytotoxic CTx                              | 27 (22.1) |
| Nth line systemic therapy                  |           |
| 1                                          | 35 (28.7) |
| 2                                          | 44 (36.1) |
| 3                                          | 25 (20.5) |
| 4                                          | 13 (10.7) |
| ≥ 5                                        | 5 (4.1)   |
| Maintained the systemic regimen after LART |           |
| Yes                                        | 82 (67.2) |
| No                                         | 40 (32.8) |

CTx, chemotherapy; LART, local ablative radiotherapy; TKI, tyrosine kinase inhibitor.
