# Supplementary figures and images for: Aggressive Local Ablative Radiotherapy Mitigates Progression Risk in Oligometastatic Lung Adenocarcinoma
Source: PubMed Central journal article supplement — Cancer Res Treat. 2023 Aug 29;56(1):115–24. doi: 10.4143/crt.2023.600 (PMC10789958; doi:10.4143/crt.2023.600), 2023-08-29

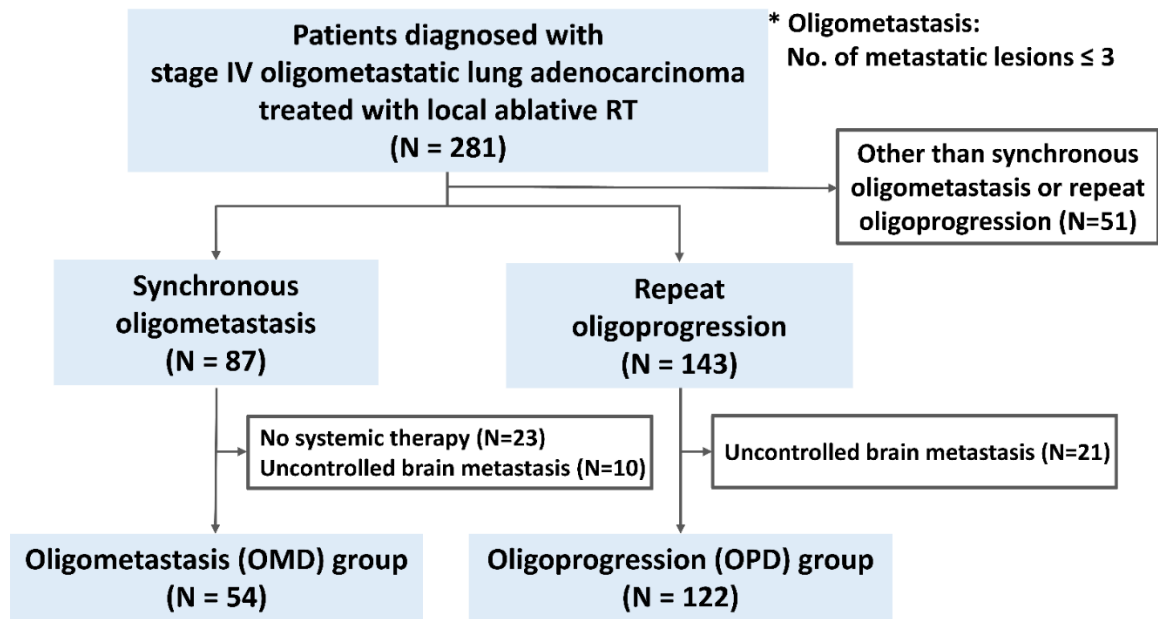

**S1 Fig.** CONSORT diagram. RT, radiation therapy.

Supplement: crt-2023-600_S1_Fig.pdf [file crt-2023-600_S1_Fig.pdf]
